# Supplementary material
Source: PubMed Central journal article supplement (PMC3162353)
Supplement: supp_blood-2011-04-351239_Document1.pdf [file supp_blood-2011-04-351239_Document1.pdf]

**Table S1.** Primary ALL samples characteristics

| Patient | Sample ID | Sample Type        | Karyotype                                     |
|---------|-----------|--------------------|-----------------------------------------------|
| 1       | ICN13     | Diagnosis          | <i>MLL-AF4</i><br><i>BCR-ABL1</i> p210, T315I |
| 2       | LAX2      | Relapse            | Mutant                                        |
| 3       | TXL2      | Diagnosis          | <i>BCR-ABL1</i> p210                          |
| 4       | TXL3      | Diagnosis          | <i>BCR-ABL1</i> p210                          |
| 5       | SFO2      | Relapse            | <i>BCR-ABL1</i> p210                          |
| 6       | ICN6      | Diagnosis          | <i>TEL-AML1</i>                               |
| 7       | ICN12     | Diagnosis          | <i>E2A-PBX1</i>                               |
| 8       | SFO1      | Relapse            | Unknown                                       |
| 9       | SFO3      | Relapse            | Unknown                                       |
| 10      | LAX6      | Diagnosis          | <i>Unknown</i>                                |
| 11      | LAX7      | Diagnosis          | Normal                                        |
| 12      | LAX7R     | Relapse of<br>LAX7 | Normal                                        |
| 13      | LAX3      | Diagnosis          | Normal                                        |
| 14      | LAX12     | Diagnosis          | Unknown                                       |
| 15      | LAX20     | Diagnosis          | Unknown                                       |
| 16      | LAX1      | Diagnosis          | T-ALL                                         |
| 17      | LAX1R     | Relapse of<br>LAX1 | T-ALL                                         |
| 18      | LAX27     | Relapse            | T-ALL                                         |
|         | ICN1      | Diagnosis          | <i>BCR-ABL1</i> p210                          |

Sample type and karyotype of primary ALL samples.

**Table S2.** Viability of primary ALL Cells 15 days post-treatment with EZN-3042 and chemotherapy

|              | Mock  | STD   | VDL or Nilotinib | STD   | VDL or Nilotinib + EZN-3088 | STD   | VDL or Nilotinib + EZN-3042 | STD   |
|--------------|-------|-------|------------------|-------|-----------------------------|-------|-----------------------------|-------|
| <b>SFO2</b>  | 86.7% | ± 1.9 | 88.4%            | ± 5.8 | 73.4%                       | ± 1.8 | 3.6%                        | ± 0.5 |
| <b>SFO3*</b> | 77.2% | ± 6.2 | 34.5%            | ± 5.1 | 31.6%                       | ± 4.1 | 2.7%                        | ± 0.9 |
| <b>LAX7R</b> | 76.8% | ± 6.5 | 78.3%            | ± 1.4 | 84.6%                       | ± 1.5 | 12.8%                       | ± 3.0 |

\*Day 21 Post-Treatment

**Table S3.** Percent Viability (Annexin V/ 7AAD<sup>-</sup>) of SFO2 After Treatment with EZN-3042 and Chemotherapy

| SFO2          | Mock  | STD   | VDL or Nilotinib | STD   | Nilotinib + EZN-3088 | STD   | Nilotinib + EZN-3042 | STD   |
|---------------|-------|-------|------------------|-------|----------------------|-------|----------------------|-------|
| <b>Day 9</b>  | 57.0% | ± 3.2 | 30.2%            | ± 8.8 | 23.2%                | ± 7.9 | 28.6%                | ± 3.9 |
| <b>Day 15</b> | 48.6% | ± 8.7 | 31.2%            | ± 6.4 | 39.7%                | ± 8.3 | 1.4%                 | ± 0.8 |

**Table S4.** Percent Viability (Annexin V/ 7AAD<sup>-</sup>) TXL3 After Treatment with EZN-3042 and Chemotherapy

| TXL3          | Mock  | STD   | VDL or Nilotinib | STD   | Nilotinib + EZN-3088 | STD   | Nilotinib + EZN-3042 | STD   |
|---------------|-------|-------|------------------|-------|----------------------|-------|----------------------|-------|
| <b>Day 13</b> | 34.1% | ± 9.1 | 18.2%            | ± 3.1 | 28.3%                | ± 2.0 | 4.8%                 | ± 0.7 |

**Legend: (S2)** Mean viability percent of triplicates of various treatment groups are shown for Day 15 of SFO2 and LAX7R of Figure 5C and 5H, respectively. Day 21 mean percent viabilities of SFO3 shown for Figure 5F. P-Values ≤ 0.01, for survivin-targeting EZN-3042 co-treatment compared to EZN-3088 co-treatment for SFO2, SFO3, and US7R or p-values equaling 0.0007, 0.01, and 0.0001, respectively, on indicated post-treatment timepoints. **(S3)** SFO2 annexin V staining of respective treatment conditions for treatment days 9, 13, and 15 are shown resulted in a mean reduction in the annexin V-/7-AAD<sup>-</sup> population by EZN-3042 + nilotinib to 1.4% ± 0.8%, compared EZN-3088 + nilotinib of 39.7% ± 8.3% of respective triplicates, on day 15 post-treatment (p-value>0.0007). **(S4)** Annexin V staining of respective treatment conditions for treatment days 9 of TXL3 resulted in a mean reduction in the annexin V-/7-AAD<sup>-</sup> population by EZN-3042 + nilotinib to 4.8% ± 0.7%, compared EZN-3088 + nilotinib of 28.3% ± 2.0% of respective triplicates, on day 13 post-treatment (p-value>0.00003). Statistical analyses performed using a student paired T-test.

**Table S5.** Sequences of relevant oligonucleotide primers

**PCR primers**

*hBIRC5* F 5'-CATCTCTACATTCAAGAACTGG-3' (Bhojwani et al, 2006)  
*hBIRC5* R 5'-GGTTAATTCTTCAAACCTGCTTC -3' (Bhojwani et al, 2006)  
*hGAPDH* F 5'-GTTGCCATCAATGACCCCTTCATTG-3'  
*hGAPDH* R 5'-GCTTCACCACCTTCTTGATGTCATC-3'  
*mHPRT* F 5'-GGGGGCTATAAGTTCTTTGC-3'  
*mHPRT* R 5'-TCCAACACTTCGAGAGGTCC-3'

**Survivin overexpression cloning primers**

*hBIRC5* F 5'-GTCATACTCGAGGCCACCATGGGTGCCCCGACGTTGCC-3'  
*hBIRC5* R 5'-ACGCCGAATTCTCAATCCATGGCAGCCAGCTGCT-3'

**Table S6.** Sequences of shRNA and EZN-3042

**shRNA target sequences**

Non-Silencing 5'-CGGACTTGAATGGAATGATAAT- 3'  
*hBIRC5* 5'- CCTTAGCAATGTCTTAGGAAA -3' (targeting survivin sequence 519–539)

**LNA Sequences**

EZN-3088 5'-**CGT**cagtatgcg**AAT**c-3'  
EZN-3042 5'-**CTCA**atccatgg**CAG**c-3' (targeting position 418–433)

**\*Bold capital letters denote LNA modifications**

**Figure S1.** CD19<sup>+</sup> survivin expression in healthy volunteer samples

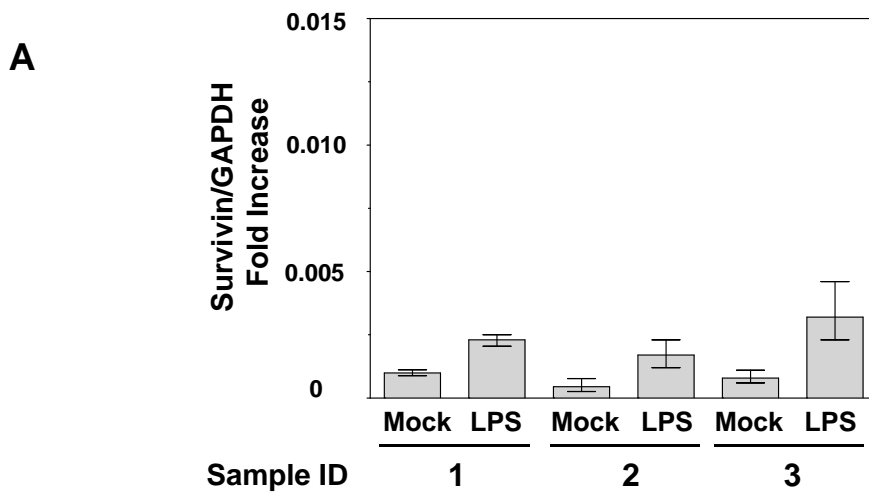

| Case | LPS | Sample ID      | Tissue Type      | Phenotype         |
|------|-----|----------------|------------------|-------------------|
| 1    | -   | Normal B-Cells | Peripheral Blood | CD19 <sup>+</sup> |
|      | LPS | Normal B-Cells | Peripheral Blood | CD19 <sup>+</sup> |
| 2    | -   | Normal B-Cells | Peripheral Blood | CD19 <sup>+</sup> |
|      | LPS | Normal B-Cells | Peripheral Blood | CD19 <sup>+</sup> |
| 3    | -   | Normal B-Cells | Peripheral Blood | CD19 <sup>+</sup> |
|      | LPS | Normal B-Cells | Peripheral Blood | CD19 <sup>+</sup> |

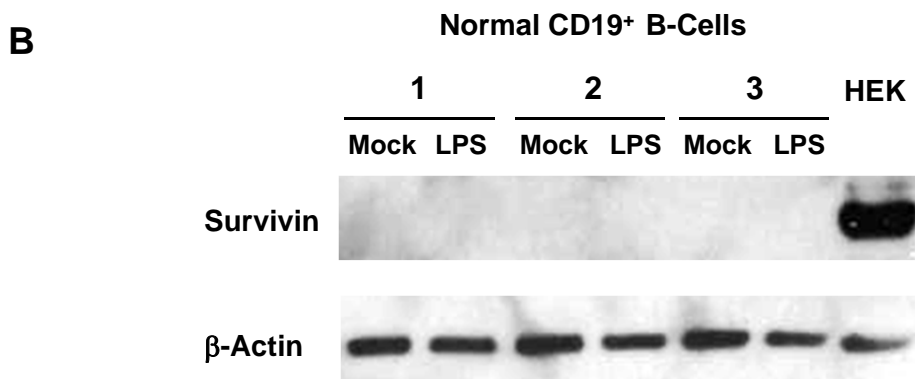

**Legend:** Peripheral blood from healthy volunteers were sorted for CD19<sup>+</sup> cells by FACS, following ficoll separation of mononuclear cells (MNCs). **(A)** Subsequently, respective samples were stimulated with 2.5 μg/ml of lipopolysaccharide (LPS) or mock treatment with vehicle control for 48 hours. Real-time PCR results for healthy volunteer samples analyzed in triplicate., **(B)** Western blot and real-time PCR (data not shown) for survivin expression in both LPS unstimulated and stimulated conditions, was determined.

**Figure S2. Endogenous survivin expression in ALL cells**

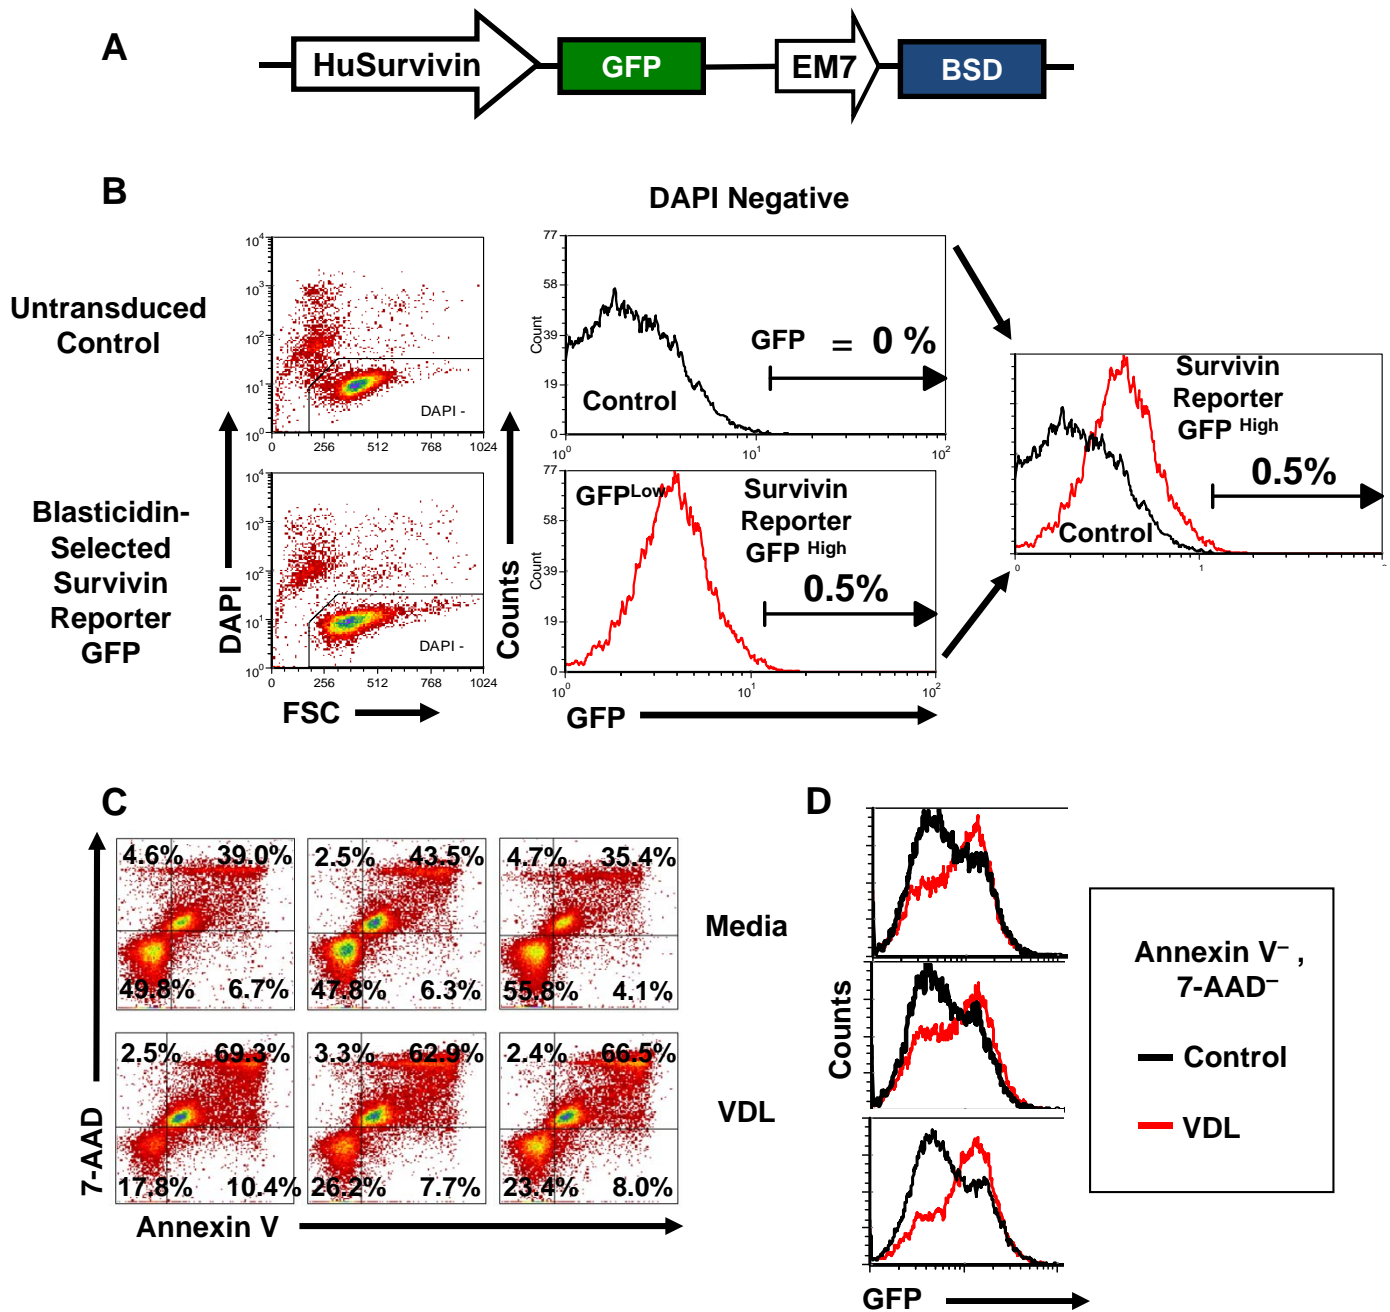

**Legend:** (A) Schematic of the human survivin promoter-driven GFP reporter (Survivin reporter GFP). (B) FAC Sorting of survivin expressing ALL cells, depicting transduction control under blasticidin selection (8  $\mu\text{g}/\text{mL}$ ), untransduced control, and survivin reporter GFP transduced ALL. Cells characterized to be highly expressing GFP compared to untransduced controls, were 0.5% of the total DAPI negative population. (C) Primary ALL transduced with the survivin reporter GFP were treated in triplicate with either media control or a combination of Vincristine (1 nM), Dexamethasone (0.1 nM), and L-Asparaginase (0.01 IU) (VDL) for 48 hours and stained for annexin V/7-AAD. (D) Histograms for show enriched survivin promoter activity in VDL treated annexin V<sup>-</sup>/7-AAD<sup>-</sup> versus control.

**Figure S3.** Ectopic survivin expression in primary pre-B ALL cells

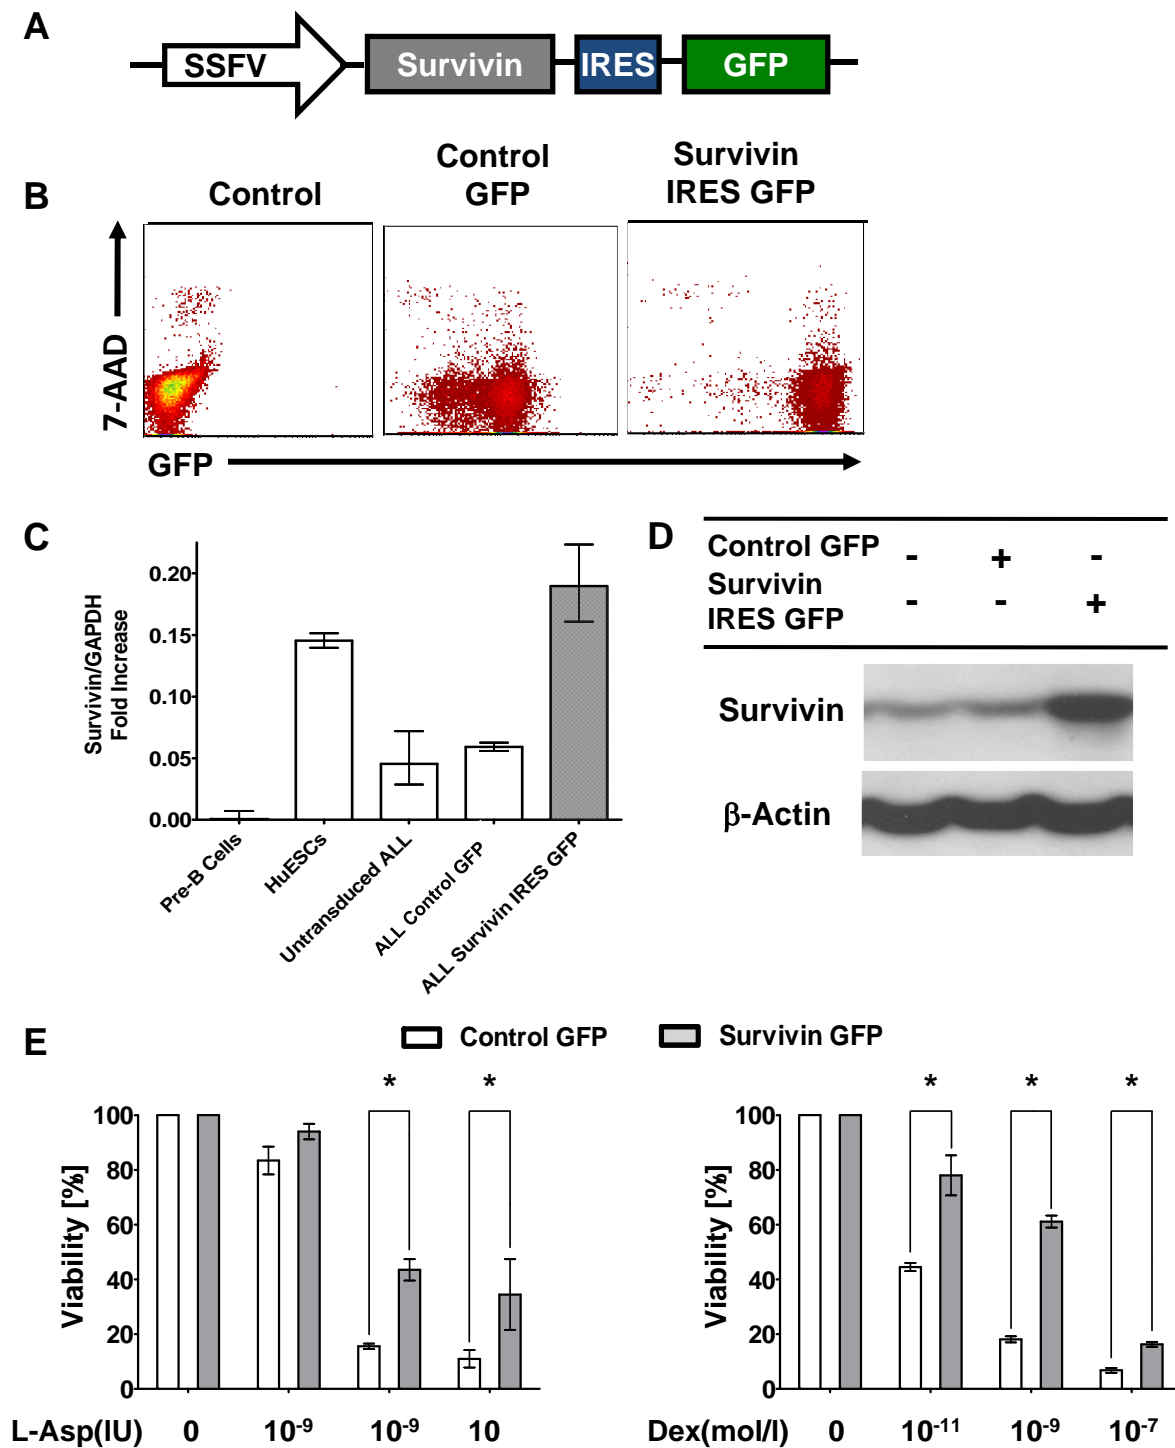

**Legend:** (A) A lentiviral Survivin IRES GFP was used to sort ALL cells ectopically expressing survivin by flow cytometry (B). (C) Survivin expression was detected by qPCR to be a mean 3.2 fold higher than in control GFP cells and by Western blot more than 3-fold (D). (E) Diminished sensitivity of survivin IRES GFP ALL cells versus control GFP cells to single agents L-Asparaginase and Dexamethasone was observed in respective MTT assays.

**Figure S4.** Knockdown of survivin expression in ALL cells

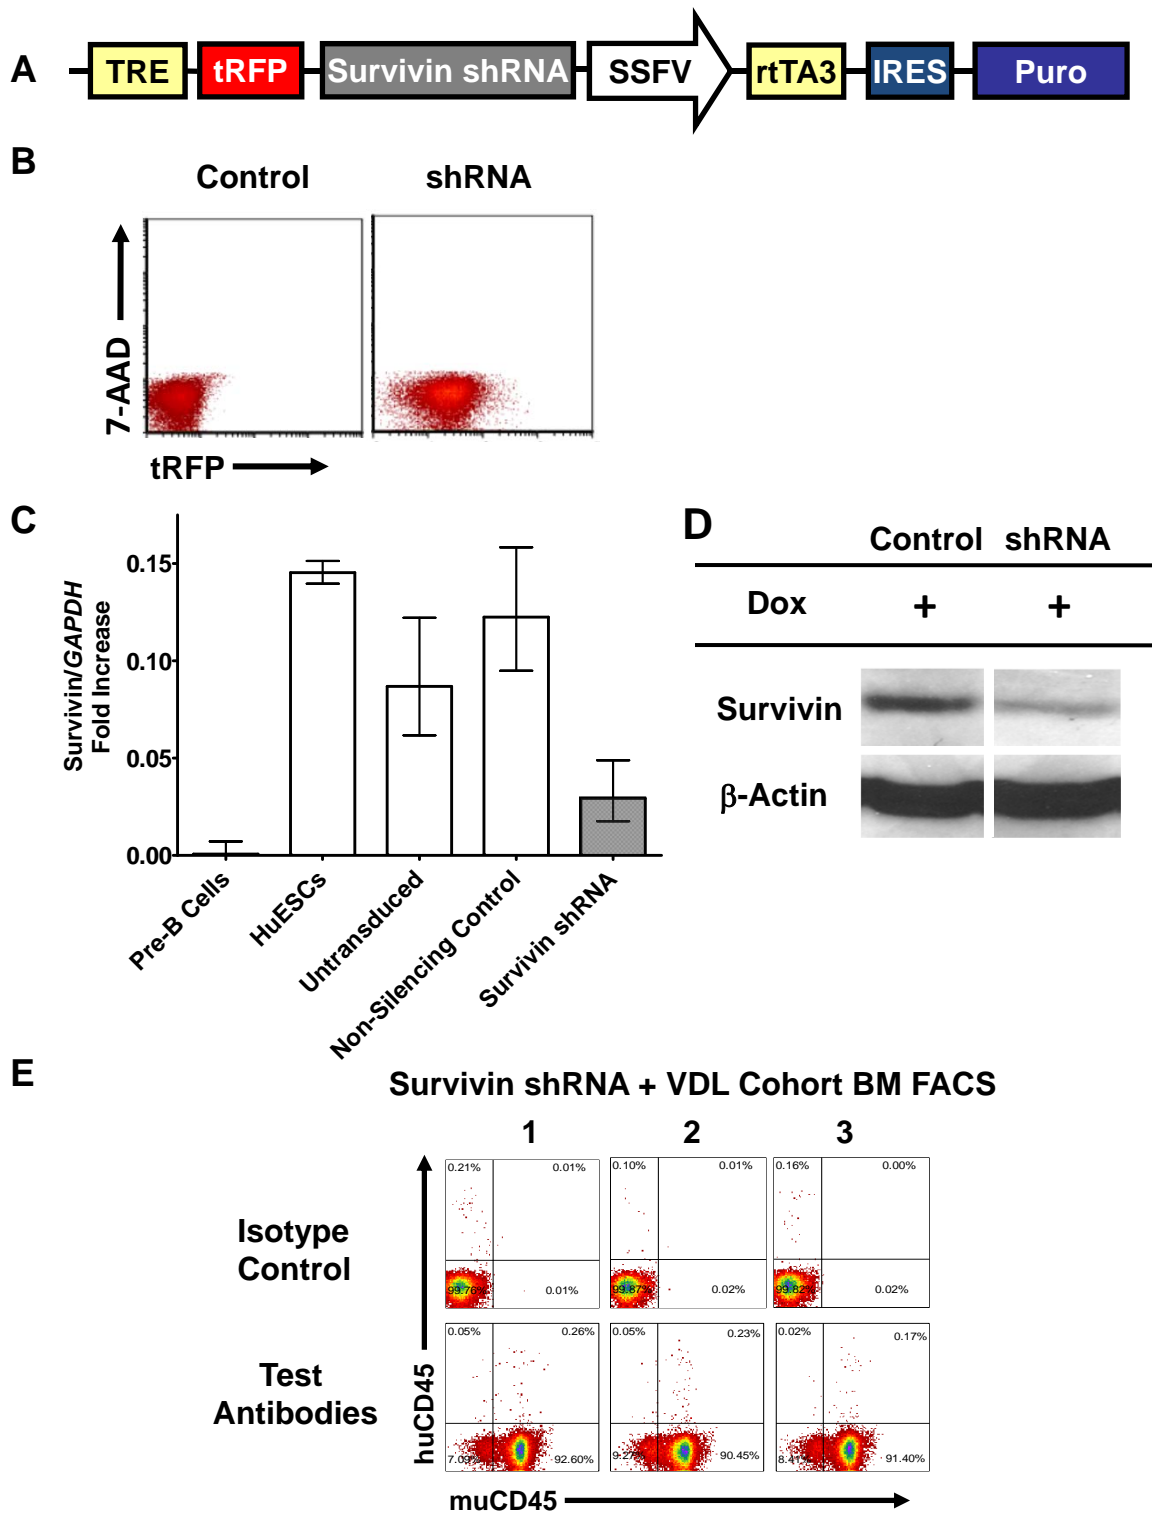

**Legend:** (A) Knockdown of survivin was performed using an inducible lentiviral shRNA vector. (B) Inducible knockdown by doxycycline induction was determined via RFP expression confirmation by FACS analysis. (C) Knockdown was quantified by qPCR and confirmed to achieve a mean 76% knockdown of survivin mRNA transcript. (D) Western Blot determined that survivin protein was knocked down. (E) CD45 BM FACS of Survivin shRNA cohort (n=3).

**Figure S5.** Conditional deletion of survivin abrogates leukemia in vitro

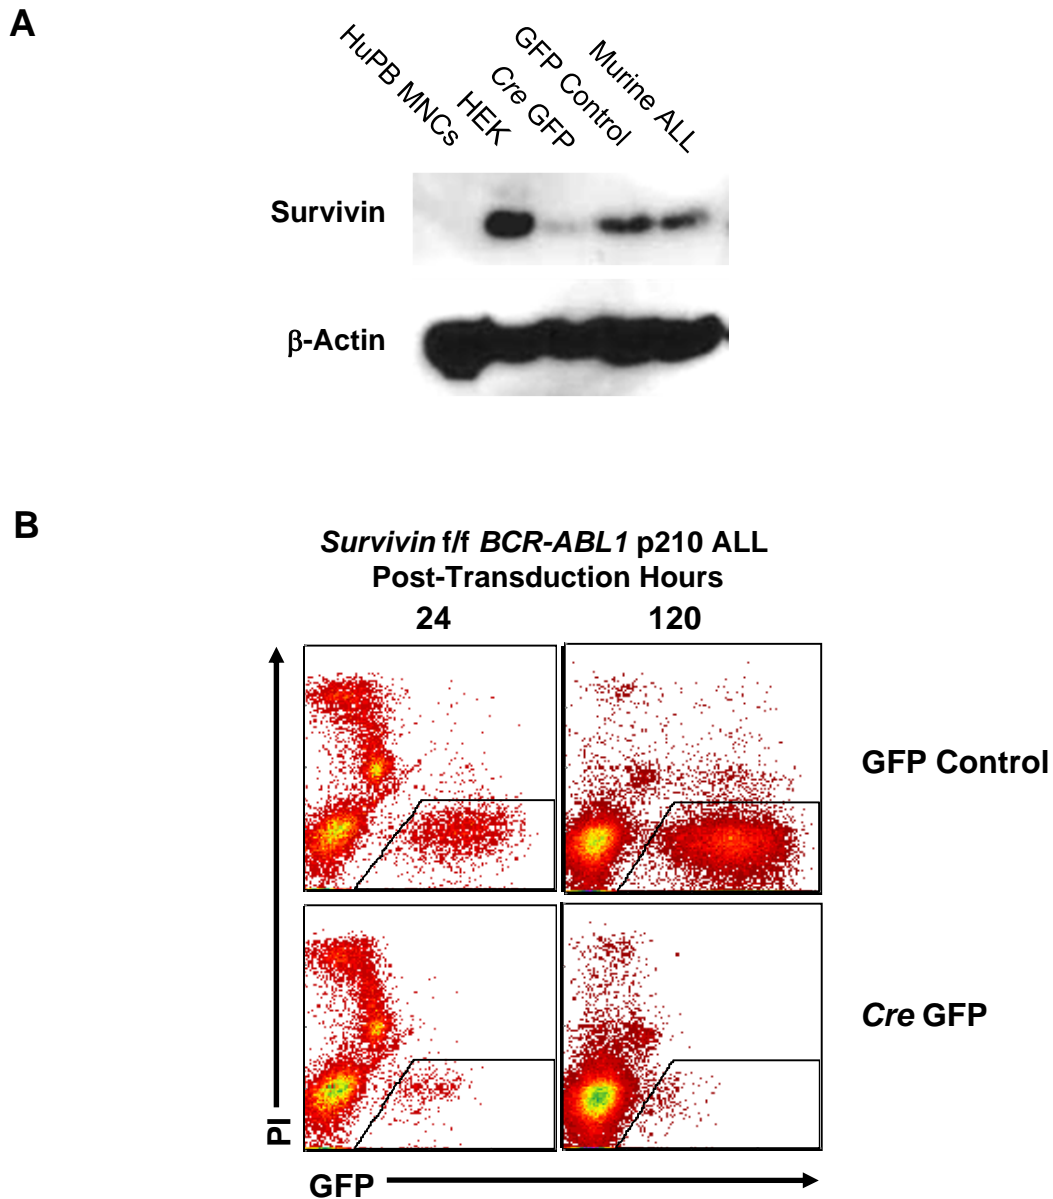

**Legend:** (A) Western blot confirmation of survivin-deletion using Cre-GFP and GFP control vectors. (B) Cre-GFP and GFP control transduced *BCR-ABL1* p210 murine leukemia were monitored for GFP expression by FACS. Mean 24 hour to 120 hour growth in percent GFP positive cells was 243% and 105%, for *BCR-ABL1* controls. Mean 24 hour to 120 hour growth in percent GFP positive cells for *BCR-ABL1* Cre-GFP transduced cells was -18%, with representative FACS plot shown for hours 24 and 120 shown, respectively. Statistical analyses at 120 hours performed using a paired student T-test.





**Figure S7. Combination index (CI) for EZN-3042 + VDL**

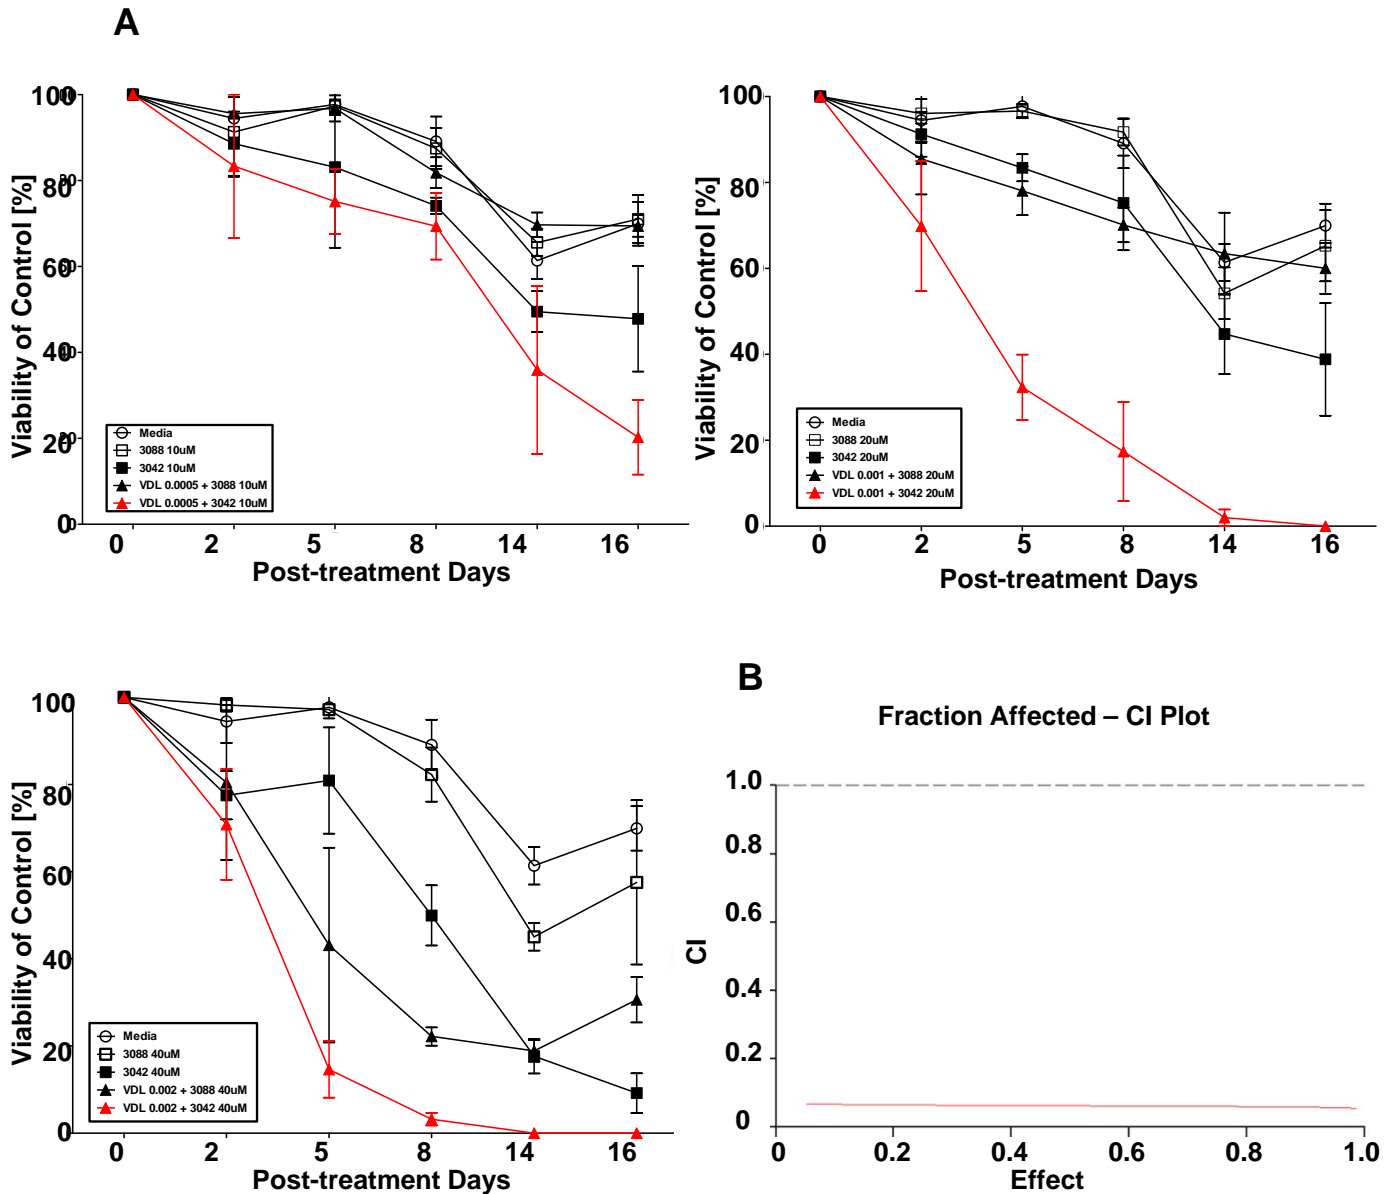

**Legend:** (A) SFO3 was treated with media only, VDL alone, or in combination with EZN-3088 or EZN-3042. Viability was determined on days noted by trypan blue exclusion, for the various drug concentrations. (B) Synergistic effects of EZN-3042 plus VDL on primary human ALL cells. CI plot calculated on the basis of viability assessed by trypan blue exclusion indicating synergistic effects ( $CI < 1$ ) of the combination of EZN-3042 plus VDL above an affected fraction  $F_a < 0.0$ , for day 16 post-treatment. The CI Index for  $F_a = 0.5$  was calculated as  $0.06 \pm 0.05$ . CI Index was calculated using CalcuSyn software application of the Chou-Talalay Method (Cambridge, United Kingdom).

**Figure S8.** EZN-3042 does not interfere with BCR-ABL1 and downstream target CrkL

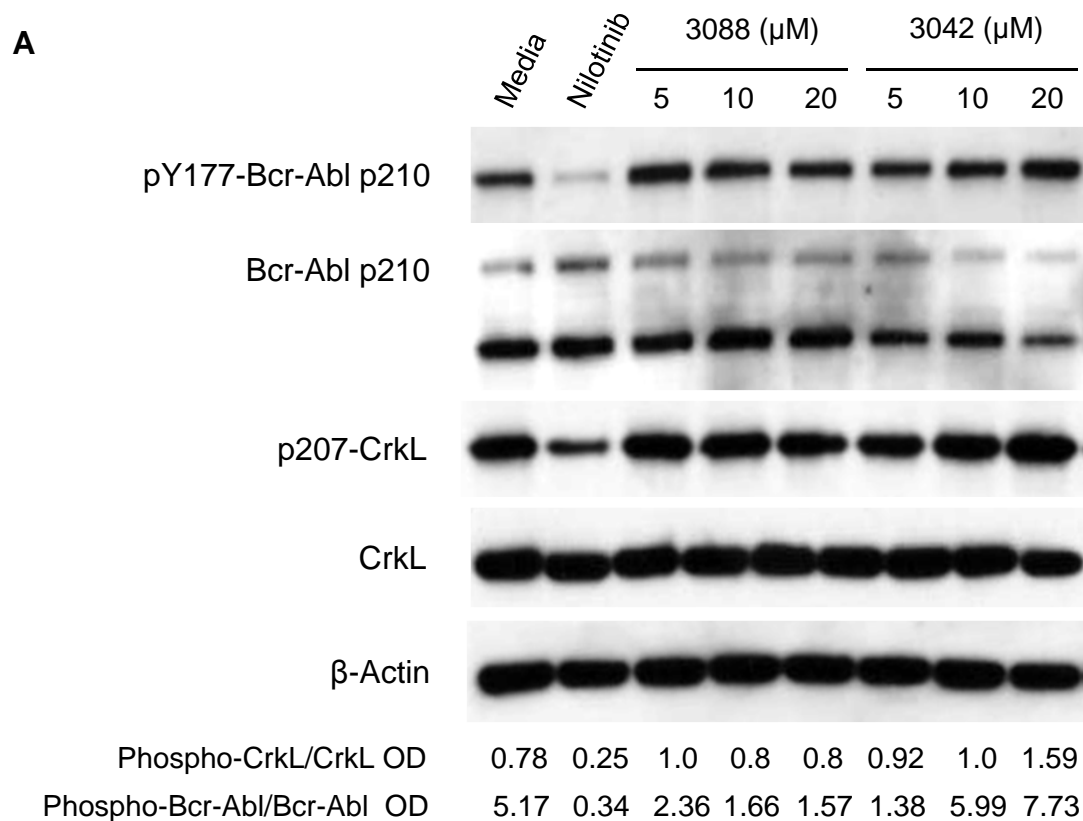

**Legend:** SFO2 (ALL cells) were co-cultured with OP9 cells and treated with media only, single agent scrambled antisense EZN-3088 (3088) (5 – 20  $\mu$ M) or survivin antisense EZN-3042 (3042) (5 - 20  $\mu$ M) for 6 days. Pre-treated ALL were subsequently treated with either vehicle or Nilotinib (500 nM) before cell harvesting 4 hours post TKI-treatment. Cell lysates then analyzed by (A) Western blot analysis for phospho-CrkL, total CrkL, phospho-BCR-ABL1, total BCR-ABL1, survivin, and  $\beta$ -Actin was determined. The optical density (OD) ratio of phospho-CrkL to total CrkL or phospho-BCR-ABL1 OD to total BCR-ABL1 OD, was calculated using Image J software (U.S. National Institutes of Health; Bethesda, MD).
